# Supplementary material for: Comparison of twelve single-drug regimens for the treatment of type 2 diabetes mellitus
Source: PubMed Central journal article supplement (PMC5641162; doi:10.18632/oncotarget.20282), 2017-08-16
Supplement: oncotarget-08-72700-s001.pdf [file oncotarget-08-72700-s001.pdf]

# Comparison of twelve single-drug regimens for the treatment of type 2 diabetes mellitus

## SUPPLEMENTARY MATERIALS

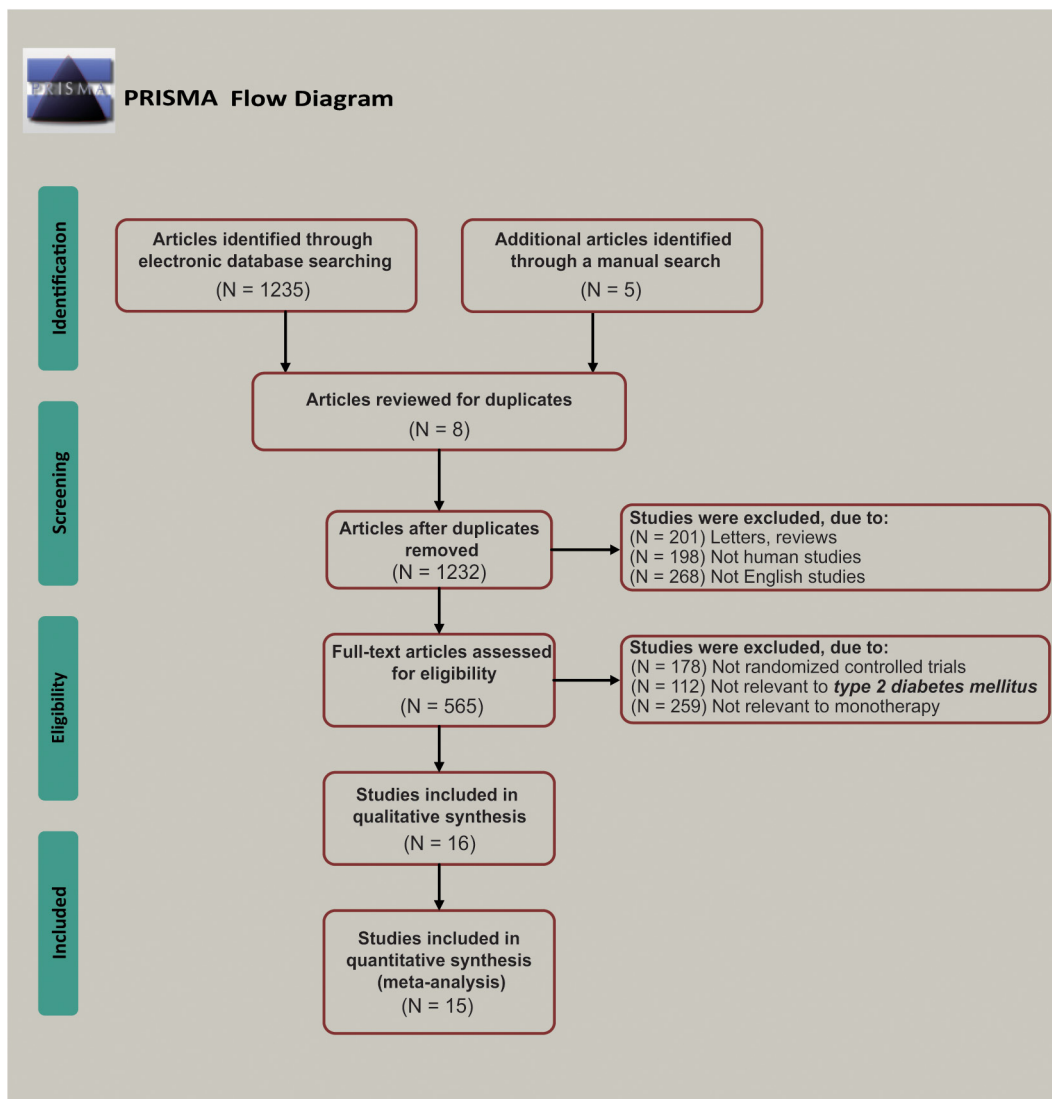

Supplementary Figure 1: Flow chart of the literature search and study selection process.

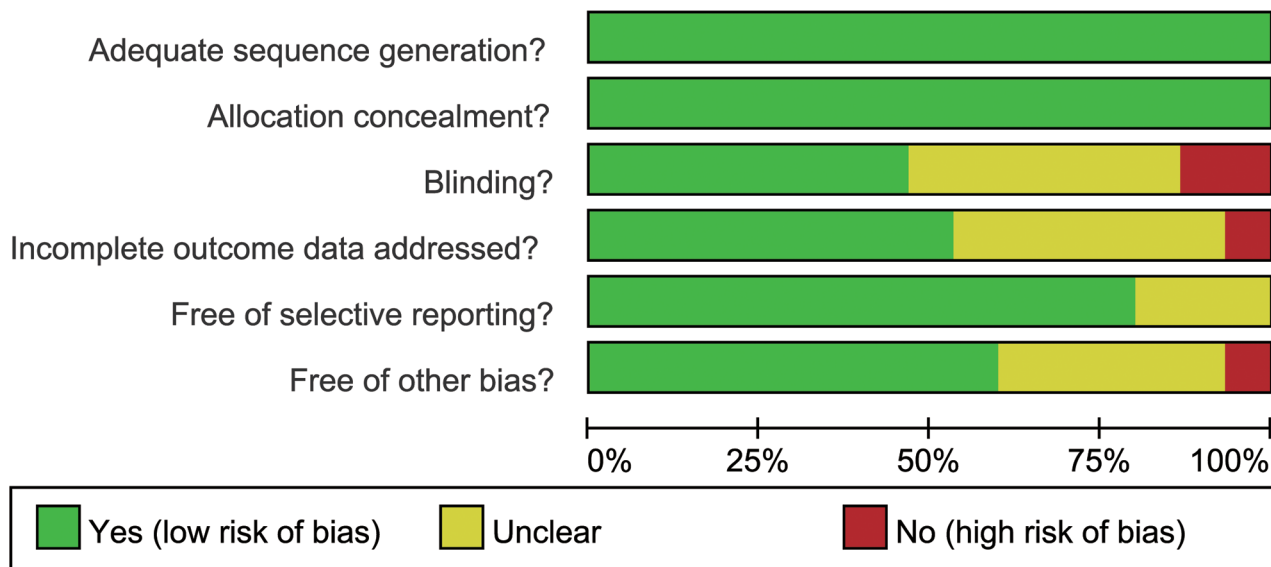

Supplementary Figure 2: Cochrane system bias evaluation of included studies.

Appendix Table 1A: The baseline characteristics for included studies.

Appendix Table 1B: The baseline characteristics for included studies.

See Supplementary File 1

Appendix Table 2: Weighted mean difference (WMD) and 95%CI of twelve treatment modalities of FPG, HDL, LDL and Triglycerides.

See Supplementary File 2

**Appendix Table 3: SUCRA values of eleven treatment modalities under six endpoint outcomes after sensitivity analysis**

| Treatments | SUCRA values (%) |              |              |              |              |               |
|------------|------------------|--------------|--------------|--------------|--------------|---------------|
|            | FPG              | HbA1c        | TC           | HDL          | LDL          | Triglycerides |
| A          | <b>75.10</b>     | <b>71.00</b> | 53.50        | <b>73.71</b> | <b>76.83</b> | 33.88         |
| B          | 54.60            | 67.73        | 55.88        | <b>57.14</b> | <b>63.67</b> | 29.62         |
| C          | 45.30            | 37.73        | 44.25        | 45.57        | 47.17        | <b>80.88</b>  |
| D          | 33.00            | 48.27        | 15.62        | 39.57        | 30.17        | <b>83.88</b>  |
| E          | 65.70            | <b>79.00</b> | <b>69.50</b> | <b>76.00</b> | <b>76.33</b> | 36.25         |
| F          | <b>74.10</b>     | 61.09        | <b>80.88</b> | 52.29        | 56.17        | <b>73.75</b>  |
| G          | NR               | 60.09        | NR           | NR           | NR           | NR            |
| I          | <b>79.60</b>     | <b>95.73</b> | NR           | NR           | NR           | NR            |
| J          | 23.80            | 11.73        | NR           | NR           | NR           | NR            |
| K          | 55.80            | 32.00        | <b>68.25</b> | 56.71        | NR           | 73.12         |
| L          | 43.70            | 35.00        | 61.62        | NR           | NR           | 36.38         |

Notes: SUCRA=surface under the cumulative ranking curves; NR=not report; FPG=fasting plasma glucose; HbA1c=glycated hemoglobin; TC=total cholesterol; HDL=high density lipoprotein; LDL=low density lipoprotein; A=Glibenclamide; B=Glimepiride; C=Pioglitazone; D=Rosiglitazone; E=Repaglinide; F=Metformin; G=Sitagliitin; I=Liraglutide; J= Acarbose; K=Benfluorex; L=Glipizide; Bold font, the SUCRA is relatively higher when compared with other interventions.

**Appendix Table 4: SUCRA values of twelve treatment modalities under six endpoint outcomes after meta regression analysis**

| Treatments | SUCRA values (%) |              |              |              |              |               |
|------------|------------------|--------------|--------------|--------------|--------------|---------------|
|            | FPG              | HbA1c        | TC           | HDL          | LDL          | Triglycerides |
| A          | <b>75.46</b>     | <b>68.74</b> | 54.96        | <b>57.85</b> | <b>60.91</b> | 38.13         |
| B          | 57.81            | 68.06        | 58.13        | 54.50        | 52.04        | 35.41         |
| C          | 45.27            | 40.47        | 56.33        | 53.54        | 48.76        | <b>82.63</b>  |
| D          | 34.19            | 50.68        | 48.74        | 50.75        | 36.88        | <b>85.30</b>  |
| E          | 65.60            | <b>78.36</b> | 19.09        | <b>68.64</b> | <b>69.66</b> | 43.44         |
| F          | <b>71.56</b>     | 61.47        | 63.50        | 54.02        | 55.10        | <b>77.00</b>  |
| G          | 46.23            | 48.73        | <b>73.51</b> | <b>59.43</b> | 46.13        | 22.14         |
| H          | 50.16            | 59.11        | 40.40        | 46.13        | <b>80.52</b> | 45.84         |
| I          | <b>80.65</b>     | <b>95.15</b> | NR           | NR           | NR           | NR            |
| J          | 24.37            | 12.40        | NR           | NR           | NR           | NR            |
| K          | 54.64            | 32.80        | <b>70.90</b> | 55.14        | NR           | 76.52         |
| L          | 44.08            | 34.03        | <b>64.42</b> | NR           | NR           | 43.59         |

Notes: SUCRA=surface under the cumulative ranking curves; NR=not report; FPG=fasting plasma glucose; HbA1c=glycated hemoglobin; TC=total cholesterol; HDL=high density lipoprotein; LDL=low density lipoprotein; A=Glibenclamide; B=Glimepiride; C=Pioglitazone; D=Rosiglitazone; E=Repaglinide; F=Metformin; G=Sitagliitin; H=Exenatide; I= Liraglutide; J= Acarbose; K=Benfluorex; L=Glipizide; Bold font, the SUCRA is relatively higher when compared with other interventions.
